## 1 **Septins disruption controls tumor growth and enhances efficacy of Herceptin**

2  
3 Rakesh K Singh\*<sup>1</sup>, Kyu Kwang Kim<sup>1</sup>, Negar Khazan<sup>1</sup>, Rachael B. Rowswell-Turner<sup>1</sup>, Christian  
4 Laggner<sup>3</sup>, Aaron Jones<sup>1</sup>, Priyanka Srivastava<sup>1</sup>, Virginia Hovanesian<sup>4</sup>, Liz Lamere<sup>1</sup>, Thomas  
5 Conley<sup>1</sup>, Ravina Pandita<sup>1</sup>, Cameron Baker<sup>5</sup>, Jason R Myers<sup>5</sup>, Elizabeth Pritchett<sup>5</sup>, Awada Ahmad<sup>1</sup>,  
6 Luis Ruffolo<sup>2</sup>, Katherine Jackson<sup>2</sup>, Scott A. Gerber<sup>2</sup>, John Ashton<sup>5</sup>, Michael T. Milano<sup>6</sup>, David  
7 Linehan<sup>2</sup>, Richard G Moore<sup>1</sup>

8  
9 <sup>1</sup>Wilmot Cancer Institute, Division of Gynecologic Oncology, Department of Obstetrics and  
10 Gynecology, University of Rochester Medical Center, Rochester, NY, USA.

11 <sup>2</sup>Department of Surgery, Microbiology and Immunology; Department of Radiation Oncology and  
12 Center for Tumor Immunology Research, University of Rochester Medical Center, Rochester, NY,  
13 USA.

14 <sup>3</sup>Atomwise Inc, San Francisco, CA, USA.

15 <sup>4</sup>Rhode Island Hospital, Providence, RI, USA.

16 <sup>5</sup>Genomics Research Center, Wilmot Cancer Center, University of Rochester Medical Center, NY,  
17 USA.

18 <sup>6</sup>Department of Radiation Oncology, University of Rochester, NY, USA.

19  
20  
21 \*Corresponding author:

22 [Rakesh\\_Singh@URMC.Rochester.Edu](mailto:Rakesh_Singh@URMC.Rochester.Edu)

23 Telephone (office): 585-276-6281. Fax: 585-276-2576

### 24 25 **Abstract**

26 Septin expressions are altered in cancer cells and exhibit poor prognoses in malignancies. As the  
27 first approach to develop a septin filament targeting agent, we optimized the structure of  
28 Forchlorfenuron (FCF), a known plant cytokinin to generate UR214-9, which contrary to FCF,  
29 causes septin-2/9 filamental structural catastrophe in cancer cells without altering cellular septin  
30 protein levels. *In-silico* docking using septin-2/septin-2 dimer complex showed that UR214-9  
31 displaced the guanine carbonyl oxygen from the GDP binding domain and showed increased  
32 binding energy than FCF(-8.59vs-7.21). UR214-9 reduced cancer cell growth, downregulated  
33 HER2/STAT-3 axis and controlled growth of HER2+ pancreatic, breast and ovarian cancer  
34 xenografts in NSG mice and enhanced response of Herceptin against HER2+breast cancer  
35 xenograft. Transcriptome analysis of UR214-9 exposed cells demonstrated significant  
36 perturbation of <20 genes compared to afatinib which impacted >1200 genes in JIMT-1 breast  
37 cancer cells indicating target specificity and non-transcriptional functions of UR214-9. In summary,  
38 disrupting septins via UR214-9 is a new approach to control the growth of HER2+ malignancies.

### 39 40 **Introduction**

41  
42 Septins are a family of GTP-binding cytoskeletal proteins that participate in cytokinesis,  
43 cell migration, chromosomal dynamics and protein secretion. Septins hetero-oligomerize to  
44 generate scaffolding filaments, bundles, and rings within cells<sup>1-11</sup>. Additionally, septins are a  
45 critical cytoskeletal component that regulate the function of tubulin and actin. Altered septin  
46 protein expression in pancreatic, kidney, lung, colorectal, skin, brain, endometrial, ovarian, breast  
47 and other malignancies have been observed<sup>12-16</sup>. Aberrant septin expression has also been linked  
48 to neurodegenerative/neuromuscular diseases, blood disorders, infertility, and developmental  
49 disabilities<sup>17-19</sup>. It is unclear whether aberrant enrichment of individual septin family members is  
50 enough to enhance tumorigenesis or if a specific hetero-oligomer assembly may be implicated.

51 Pharmacologic agents to target septins have remained elusive, largely because the oligomeric  
52 structural configurations of septins pose difficult challenges in designing therapies.

53 In this study, we investigated the impact of individual septins on the survival of patients  
54 with cancers of the pancreas, breast, lung, kidney, or liver cancer or with melanoma. To determine  
55 the effect of septins on survival, we used the Human Protein Atlas (HPA), and publically available  
56 transcriptional data and tools available at R2:Genomics Analysis and Visualization Platform<sup>20</sup>  
57 (<https://hgserver1.amc.nl/cgi-bin/r2/main.cgi>). We describe a potent septin modulator, UR214-9,  
58 which disrupts structural organization of septin-2 and septin-9 as well as of  $\beta$ -actin, and controls  
59 cancer cell proliferation and tumor growth. We have employed molecular docking techniques to  
60 investigate how UR214-9 and its analogs interact with the elements of the GDP binding domain,  
61 and of the known FCF binding pocket. To identify how gene expression is impacted by UR214-9,  
62 and thereby characterize its off-target liabilities, we have conducted transcriptome analyses of  
63 UR214-9 treated breast and pancreatic cancer cells. In summary, our studies present UR214-9,  
64 as a potent and novel septin filamental modulator and demonstrate that the dismantling of septin  
65 structures in pancreatic, ovarian and breast cancer cells by UR214-9 can be an effective  
66 therapeutic strategy.

67  
68

## 69 Results

70

### 71 Enrichment of septins correlates with decreased survival in patients with cancer

72 Publically accessible microarray data bases of pancreatic cancer and ovarian cancer patients  
73 deposited at R2:Genomics Analysis and Visualization Platform([https://hgserver1.amc.nl/cgi-](https://hgserver1.amc.nl/cgi-bin/r2/main.cgi)  
74 [bin/r2/main.cgi](https://hgserver1.amc.nl/cgi-bin/r2/main.cgi)) were analyzed. Septin-2 mRNA was enriched in malignant pancreas compared to  
75 normal pancreas (Figure-1A,  $p=1.3e^{-4}$ ). Similarly, ovarian cancer epithelium expressed  
76 significantly enrichment of septin-2 compared to normal stroma (Figure-1B-left,  $p=1.2e^{-7}$ ). Micro-  
77 dissected stroma of malignant ovarian stroma was also exhibited elevated expression of septin-  
78 2 mRNA than normal stroma (Figure-1B-right,  $p=1.21e^{-4}$ ). Similarly, compared to normal stroma,  
79 tumor epithelium components of malignant breasts showed increased septin-2 mRNA enrichment  
80 (Figure-1C-left,  $p=0.49e^{-3}$ ). Further, increase in invasive area of breast tumors led to increased  
81 septin-2 enrichment (Figure-1C-right,  $p=8.9e^{-3}$ ). Kaplan-Meier survival of patients with pancreatic  
82 cancer, grouped by the extent of septin-2 expression (from microarray data available at  
83 <https://hgserver1.amc.nl/cgi-bin/r2/main.cgi><sup>20</sup> and Human Protein Atlas<sup>21</sup>, show that septin-2 mRNA  
84 enrichment significantly ( $p=0.0011$ ) correlates with increased mortality (Figure 1D-left). Similarly,  
85 enrichment of septin-7 and -9 correlates with increased mortalities in pancreatic cancer patients  
86 (Supplementary Figure 1). Septin-2 enrichment is also an unfavorable factor for patients with  
87 breast (Figure-1D, middle,  $p=3.9e^{-3}$ ) and ovarian cancer (Figure-1D, right,  $p=0.011$ ). Analysis of  
88 the survival prospects based on other septins indicate that septin-7 enrichment was found to be  
89 unfavorable for the patients diagnosed with malignancies of breast ( $p=0.0079$ ) (Supplementary  
90 Figure-1).

91

### 92 UR214-9 causes septin-2 catastrophe in cells

93 The chemical structure of UR214-9 is shown in Figure-2A. UR214-9 was obtained by the  
94 structure-activity relationship guided optimization of FCF. Incorporation of a group of fluorine  
95 atoms on phenyl ring and installation of a chlorine atom at C-6 of pyridine ring made UR214-9 a  
96 potent disruptor of septin's filamental structure. Confocal microscopy at higher resolution (60x2)  
97 was employed to determine the impact of DMSO, FCF (+ve control) and UR214-9 on the structural  
98 arrangement of septin-2, 6, 7 and -9 in a panel of BXPC-3, CAPAN-1, Panc-1 (pancreatic) and  
99 JIMT-1(breast) and SKOV-3 ovarian cancer cells. While FCF seems to strengthen the septin-2  
100 filaments in BXPC-3 cells (Figure-2B, left-lower), Septin-2 needles in PANC-1 were disarranged

101 and translocated at the cell-surface after UR214-9 treatment (1 $\mu$ M) (Figure 2C, lower left).  
102 Similarly, the septin-2 needles in JIMT-1 cells after drug treatment showed structural disruptions  
103 and relocation to nuclear periphery (Figure-2C, right-lower). Next, the confocal microscopy was  
104 employed to investigate the response of other septin family members in PANC-1 cells upon  
105 treatment with UR214-9. Septin-7 showed reduced expression whereas septin-9 showed  
106 disarrangement of filamental structure (Supplementary Figure-2). Septin-4, -6, did not exhibit  
107 clear filamental structures and showed punctate staining instead, which was either reduced in the  
108 treatment group compared to DMSO treated control or the drug effect was inconclusive (data not  
109 shown). Similarly, UR214-9 treated JIMT-1 breast cancer cells showed strong structural  
110 disarrangement and relocation of septin-2 on the periphery of nucleus (Figure-2, right). JIMT-1  
111 cells did not exhibit defined septin-7 structures, and therefore, the effect of UR214-9 on septin-7  
112 remains ambiguous (Supplementary Figure-2, lower left). However, the confocal microscopy of  
113 PANC-1 and JIMT-1 cells treated with UR214-9 exhibited clear disarrangement in septin-9  
114 filament structures (Supplementary Figure-2, lower right). Whether UR214-9 treatment alters  
115 expression of septin family of proteins was investigated by immunoblotting the total cell-lysates  
116 of PANC-1, MDA-MB-231, JIMT-1 and MCF-7 cancer cells. The immunoblots were probed with  
117 validated septin-2, 6,7 and -9 antibodies. In PANC-1 cells, septin-9 expression was completely  
118 inhibited intriguingly, while expression of septin-2, -6 and -7 were unaffected (Figure-2D). Similarly,  
119 western blot analysis of MDA-MB-231, JIMT-1 and MCF-7 cells showed that UR214-9 does not  
120 alter the protein expression levels of septin-2,6 and -9 family of proteins (Figure-2E) even though  
121 their filamental structures are overwhelmingly disrupted. Septin catastrophe phenomenon in  
122 cancer cells was further validated using SKOV-3 ovarian cancer cells that upon treatment with  
123 UR214-9 (1 $\mu$ M, 48hours) showed complete disruption of septin-2 filaments wherein septin-2  
124 appears to have relocated to cell surface after drug exposure (Figure-2F). Further examination of  
125 septin-6, 7 and -9 structures in drug treated SKOV-3 cells showed reorganization of septin-9  
126 (Figure-2G, lower). Septin-6 was found to be non-needle-like and decreased upon treatment with  
127 UR214-9 (Figure-2G, upper). Changes in septin-7 expression were not clear due to non-needle-  
128 like and diffused/punctated expression of UR214-9 (Figure-2G, middle).

129  
130 **UR214-9 causes actin filamental disruption in pancreatic and breast cancer cells.** Septins  
131 have been previously shown to control the function of actin<sup>22</sup>. Confocal microscopy of UR214-9  
132 treated PANC-1 and JIMT1 cells exhibited actin filament disruption (Figure-3) when treated at a  
133 dose of 1 $\mu$ M for 48 hours. Representative structural disarrangement of actin filamental needles,  
134 for both PANC-1 and JIMT1 cells, Figure-3. Area of interest are shown in shown in the white  
135 boxes.

136  
137 ***In Silico* docking shows key interactions of UR214-9 with septin-2**

138 Docking experiments to investigate the potential binding mode of UR214-9 and related  
139 compounds (including FCF) were performed. UR214-9 and its analogs are smaller in size and  
140 similar in structure and symmetry; they consist of a central urea group flanked by two lipophilic  
141 substituted aromatic rings. Compounds UR214-8, 9, and 10 are the most active compounds that  
142 we have developed; taking this into account, we hypothesized that they could share a similar  
143 binding mode (the structure of compounds UR214-8, 9 and 10 are shown in Supplementary  
144 Figure 3). Thus, compounds FCF, UR214-8, UR214-9, and UR214-10 were docked into the  
145 nucleotide binding site of PDB ID 2QNR, which is the highest quality structure of a septin-2 dimer  
146 complex available<sup>23</sup>. Upon visual inspection of the docking poses, two sets of low energy poses  
147 (“set A, upper and lower” and “set B, upper and lower”) were identified in which all highly active  
148 compounds are able to adopt similar conformations. The two sets are similar to each other in that  
149 the three main portions of the molecules – the central urea moiety, the pyridine and the phenyl  
150 ring – are in roughly the same area, with the pyridine ring taking the place of the guanine in GDP  
151 (Figure 4). In set A, the pyridine nitrogen atom is seen taking the place of the guanine carbonyl

152 oxygen atom, making a hydrogen bond with the backbone of G241 of chain A. ICM scores of set-  
153 A were found to be compound UR214-8: -8.85, compound UR214-9: -8.59, compound UR214-10:  
154 -10.4 and FCF: -7.21 indicating stronger binding energy of the synthesized analogs than the  
155 parent FCF. Set B appears to be identical to a previously reported docking pose for FCF in the  
156 same structure template, obtained with the Autodock software<sup>23</sup>. In Figure-4C and D, the identity  
157 of amino acid residues interacting with atoms of UR214-9 or its analogs are shown.

158  
159

### 160 **UR214-9 impairs cancer cell viability and blocks cell cycle progression**

161 Treatment with UR214-9 reduced the viability of human pancreatic cancer cells (BXPC-3 and  
162 PANC-1) cells (Figure 4A) during 72 hours of treatment. PANC-1 and BXPC-3 cells upon  
163 treatment with UR214-9 exhibited a large population of non-viable cells based upon staining by  
164 the Live-Dead cell kit and by flow cytometry following 72 hours of treatment (Figure 4B and -4C).  
165 Given the role of septins in the cell cycle process, we analyzed the effect of UR214-9 on cell cycle  
166 progression of PANC-1 and BXPC-3 pancreatic cancer cells at a non-cytotoxic concentration of  
167 100nM. Treatment with UR214-9 at 100nM dose caused minor S-phase arrest in PANC-1 while  
168 BXPC-3 cells showed no change in cell cycle distribution at the non-toxic doses (Supplementary  
169 Figure-2A). Increasing the dose to 3µM concentration of UR214-9 caused overwhelming arrest in  
170 G1 phase (~95% compared to 21%) of BXPC-3 cells, while PANC-1 cells showed complete arrest  
171 in sub-G1/G0 phase (data not shown). Similarly, JIMT-1 cells treated with an increased dose (3µM)  
172 of UR214-9 exhibited G1 phase arrest and showed largely increased accumulation in G0-phase  
173 (Supplementary Figure-2B)

174  
175  
176

### 177 **Analysis of cell cycle protein expression**

178 The spotted antibody array was employed to simultaneous study multiple cell-cycle related  
179 proteins expressed in drug treated or naïve PANC-1 cells. Measurement of relative photon counts  
180 showed that Cullin-3, glycogen synthase kinase-3 (GSK-3b), p19ARF, 14.3.3.Pan, APC11, APC2,  
181 ATM, C-able, CD14Aphosphatase, CDC25C, CDC34, CDC37, CDC47, CDC7, CDH1, CDK1 and  
182 CDK-3 were the most expressed and affected proteins in the treated vs naïve PANC-1  
183 considering  $\geq 2.0$  fold change as meaningful (Supplementary Figure-3C).  $\beta$ -actin showed the most  
184 pronounced expression but expression levels remained unchanged after treatment. On the other  
185 hand, Cullin-3 showed most pronounced upregulation in the treated versus naïve PANC-1 cells  
186 (Supplementary Figure-3, upper). Cullin-3, a member of the cullin-based ubiquitin ligase family  
187 interacts with Hrt1 and BTB domain containing proteins. The resulting complex functions as a  
188 Cullin3-based E3 ligase to bring specific substrates to ubiquitinylation and degradation<sup>24</sup>  
189 indicating the role of septins in suppression of cullin-3 mediated ubiquitinylation and subsequent  
190 degradation.

191  
192

### 193 **UR214-9 treatment slows the growth of HER2 +xenograft tumors**

194 Septin-2 regulates HER2 expression in gastric cancer cells<sup>25</sup>. HER2 is over-expressed in diverse  
195 variety of malignancies<sup>25-27</sup> and is known to promote tumor development, progression, metastasis  
196 and chemoresistance<sup>28</sup>. Septins are shown to protect and stabilize HER2 receptor at the plasma  
197 membrane of tumor cells to perpetuate the HER2 orchestrated tumorigenesis<sup>29</sup>. We postulated  
198 that targeting septin-2 can potentially emerge as a novel approach to control HER2 orchestrated  
199 tumorigenesis. A MTS assay showed that UR214-9 treatment reduced the growth of BXPC-3  
200 and PANC-1 pancreatic cancer dose dependently by 48<sup>th</sup> hour of drug exposure (Figure-5A).  
201 Treatment with UR214-9[3µM] created 29.4% dead cells during 48 hours of drug exposure when  
202 the total population of BXPC-3 cells was analyzed by Live-dead kit (Invitrogen Inc). Similarly,



203 PANC-1 cells presented over 38% dead-cell population upon treatment with UR214-9 [3 $\mu$ M]. Next,  
204 we determined the impact of UR214-9 treatment on pancreatic cancer xenograft tumor growth *in*  
205 *vivo*. Mice xenografted with HER2+ PANC-1 cells showed significantly delayed growth ( $p \leq 0.0001$ )  
206 (Figure -5D). The antitumor efficacy of UR214-9 was further evaluated against HER2 positive  
207 xenografts derived from JIMT1 (breast cancer) cells. In addition to increased cell death of JIMT-  
208 1 cells upon UR214-9 exposure *in vitro* (Figure-5E), JIMT1 xenograft tumors treated with UR214-  
209 9 casted a significant growth control (Figure-5F), based on both tumor volume and weight  
210 measurements (Figure-5G).

211

### 212 **UR214-9 inhibits HER2 expression and blocks phosphorylation of STAT-3**

213 Immunoblot analysis of the total cell lysates of pancreatic cancer cells PANC-1 (HER2+),  
214 cells treated with UR214-9 for 72 hours showed a dose-dependent decrease in HER2 expression  
215 in PANC-1 (Figure 6A, upper). STAT3 phosphorylation is a down-stream readout of HER2  
216 activation<sup>33</sup>, accordingly UR214-9 treatment also reduced phosphorylated STAT-3 in PANC-1  
217 (Figure 6A, lower) cells. Similarly, UR214-9 treatment reduced HER2 expression in a panel of  
218 MDA-MB-231, JIMT-1 and MCF-7 breast cancer cells (Figure-6B) and reduced phosphorylation  
219 of STAT-3 in each cell-lines (Figure-6C). We have recently shown that septin-2 is highly  
220 overexpressed in ovarian cancer<sup>30</sup>. Similar to JIMT-1 and PANC-1 cell-lines, SKOV-3, a platinum  
221 resistant ovarian cancer cell-lines is characterized by HER2 amplification<sup>31-32</sup>. We, therefore  
222 employed SKOV-3 cell-line derived xenografts to validate the antitumor efficacy of UR214-9  
223 against HER2 amplified xenograft tumors. To further ascertain the outcome of the combination of  
224 UR214-9 with Herceptin, mice were additionally treated with Herceptin alone or in combination  
225 with UR214-9. As shown in the Figure-6D, both UR214-9 and Herceptin controlled the growth of  
226 tumors. The combination clearly, controlled the tumor growth to a greater degree than both the  
227 drugs alone. The real benefit of combination of UR214-9 with Herceptin became apparent when  
228 treatments were stopped and tumors were allowed to grow. As shown in the Figure-6D while  
229 tumor sizes in UR214-9 and Herceptin group reached the average size in control when the  
230 treatments were stopped, the combination maintained greater control over tumor growth  
231 (combination  $p < 0.0001^{****}$  vs  $p = 0.0004^{***}$  and  $0.0001^{***}$  for vehicle vs UR214-9 and Herceptin).  
232 When extracted tumors were weighed, the combination group exhibited presence of smaller  
233 tumors, whereas, both the UR214-9 and Herceptin group produced the tumors that matched the  
234 average size seen in vehicle group (Figure-6E).

235

### 236 **Whole transcriptome analysis reveals that UR214-9 is target selective**

237 RNA-Seq was performed in the JIMT-1 and Panc-1 cell lines with three treatment groups (10nM  
238 Afatinib, 1 $\mu$ M UR214-9, and DMSO) of four replicates each. The samples were sequenced to an  
239 average depth of 58 million reads and greater than 90% of the read data for each sample aligned  
240 uniquely to the human reference genome (hg38) after adapter and quality trimming. The drug  
241 treatments were compared to the control group and differentially expressed genes were  
242 determined (adjusted p-value < 0.05). There were 1236 (713 up and 523 down) dysregulated  
243 genes between Afatinib treatment and control (Figure 7A and 7C). The ENRICH webtool was  
244 used to determine that the upregulated genes (ALPP, TRIM29, CYP1A1) are associated with  
245 extracellular matrix organization and cadherin binding, while the down regulated genes (EGR1,  
246 DUSP6, HMGA2, etc.) are associated with purine metabolism and ribosome biogenesis.  
247 Conversely, only 11 (7 up and 4 down) genes were called dysregulated between UR214-9  
248 treatment and control (Figure 7B and 7D). In terms of the PANC-1 cell line, there were only two  
249 genes (COL13A1 and PRSS22) determined to be significantly differentially expressed upon  
250 Afatinib treatment compared to the control group and no differentially expressed genes was called  
251 between UR214-9 and the control.

252

### 253 **Methods**

254  
255  
256  
257  
258  
259  
260  
261  
262  
263  
264  
265  
266  
267  
268  
269  
270  
271  
272  
273  
274  
275  
276  
277  
278  
279  
280  
281  
282  
283  
284  
285  
286  
287  
288  
289  
290  
291  
292  
293  
294  
295  
296  
297  
298  
299  
300  
301  
302  
303  
304

### **Cell lines, cell culture and reagents**

PANC-1, BXPC-3 and CAPAN-1, SKOV-3, MCF7, MDA-MD-231 cells were obtained from ATCC and maintained in DMEM, RPMI-1640 and IMDM supplemented with 10% fetal calf serum penicillin (100 units/mL), and streptomycin (100 µg/mL) at 37°C with 5% CO<sub>2</sub> in a humidified incubator. JIMT-1 cells were purchased from AddexBio Inc, USA (catalog number: C0006005) and maintained in 10% FBS and antibiotic supplemented DMEM. Septin-2 (catalog number: HPA018481), septin-7 (catalog number: HPA029524), septin-9 (catalog number: HPA029524) antibodies were purchased from Sigma Aldrich Inc. DyLight 488 (catalog number: DI-1488, rabbit, Dylight594 (catalog number: DI-2594, mouse) were purchased from Vector Laboratories Inc. Phalloidin-TRITC was purchased from ECM Biosciences (catalog number: PF7551). HER2 (Cell Signaling Technology, catalog number: 4290); pSTAT-3 (catalog number: 9145p), STAT-3 (catalog number: 4904) and GAPDH antibodies (catalog number: 2118s) were purchased from Cell Signaling Technology Inc. USA and used at manufacturer recommended dilutions.

### **Synthesis of FCF analogs**

UR214-9 was synthesized by coupling aryl isocyanates with 2,6-dichloro 4-aminopyridines in (0.1:0.1) molar ratio in dry DMF at 65°C overnight under an argon flushed atmosphere. The reaction was monitored using thin-layer chromatography plates with DCM-MeOH or pure ethyl acetate as eluent. Spots were monitored in a UV chamber. The reaction mixture, upon completion of the reaction, was poured into wet ice mixture and triturated and the separated solid was filtered under vacuum. The product was washed with hexane, followed by diethyl ether, and was dried under vacuum. The compounds were characterized by mass spectrometry.

### **Molecular docking**

Docking experiments to investigate the potential binding mode of 9 and related compounds were performed using Molsoft's ICM software package (v. 3.8-7). The molecules are rather small and somewhat symmetric (consisting of a central urea group flanked by two lipophilicly substituted aromatic rings). We assumed that since compounds 8, 9, and 10 are the most active ones, that they might share a similar binding mode. Thus, compounds FCF, UR214-8,- 9, and -10 were docked into the nucleotide binding site of PDB ID 2QNR, which is the highest quality structure of a septin-2 dimer complex available to date<sup>23</sup>. Receptor preparation (based on the GDP binding site in chain A) and ligand construction was performed within ICM using standard settings. ICM scores for each compound and their poses were calculated and compared with FCF. The compounds were docked with the "dock table" functionality, with a setting for effort of 2.0 and 20 poses per compound. Upon visual inspection of the docking poses, two sets of low energy poses ("set A" and "set B") stood out, in which the highly active compounds are able to adopt similar conformations<sup>23</sup>.

### **Cell Viability and cell cycle analysis,**

Cell viability of PANC-1, BXPC-3 and CAPAN-1 pancreatic cancer cells treated with UR214-9 was measured using the Cell Titre96<sup>R</sup> Aqueous One Solution Cell Proliferation Assay (Promega Corp., catalog number: G3580) following the procedure published earlier. The Live/Dead dye kit (Invitrogen Coro., catalog number: L34975) was used to estimate live and dead cell population in PANC-1 and BXPC-3 pancreatic cancer cells treated with UR214-9 or vehicle. Briefly, cells were treated with vehicle or UR214-9 (3µM) for 72 hours. Cells were harvested by trypsinization, fixed and permeabilized using Fixation-Permeabilization reagent (prepared by diluting the concentrate in the diluent in the ratio 1: 3) (Biogem Inc., diluent: catalog number 92160-00-160 and concentrate catalog number: 2550-00-50) and stained with Live/dead dye for one hour. The cells were centrifuged at 1000 rpm for 5 minutes and pellets were washed and spun down three times

305 with DPBS. The cells were analyzed by a flow cytometer and relative live and dead cell population  
306 was calculated by inputting equal number of cells in both vehicle and control group.

307 For cell cycle analysis, BXPC-3 and PANC-1 and JIMT-1 cells (100,000/well) were seeded  
308 overnight in a 6 well dishes and allowed to adhere overnight. Media was replaced with fresh  
309 complete medium supplemented with DMSO or UR214-9 (100nM and 3 $\mu$ M) and cells were  
310 incubated for 72 hours. The media containing the drugs was removed and cells were washed  
311 twice with PBS and trypsinized gently. The cells were collected in 15 mL tubes, complete DMEM  
312 media was added to block trypsin and cells were centrifuged. The supernatants were removed  
313 and cells were gently treated with 70% cold-EtOH for 30 minutes. The fixed cells were centrifuged  
314 and the pellets obtained were collected in flow cytometry tubes and stained with preformulated  
315 PI/RNase solution (Cell Signaling Technology, catalog number: 4087s) for 30 minutes. The PI  
316 content was analyzed using a flow cytometer. Data was processed using Flowjo software.

317

### 318 **Cell cycle protein expression**

319 Cell Cycle Antibody Array (FullMoon BioSystems Inc, catalogue number: ACC:058), a high-  
320 throughput ELISA based antibody array, designed for qualitative/semi-quantitative protein  
321 expression profiling was employed to investigate the protein changes after drug treatment. PANC-  
322 1 cells were lysed in buffer containing protease and phosphatase inhibitors (Cell Signaling,  
323 catalog number: 9803S). Total protein content was quantified by Bradford assay and equal  
324 amounts of proteins were analyzed in duplicate with arrays containing 4 to 6 spots for each of 60  
325 probes (ACC058, Cell Cycle Antibody Array; Full Moon Biosystems, Sunnyvale, CA), according  
326 to manufacturer's instructions. After background correction, mean signal intensities were  
327 measured using FullMoon Inc's imaging services. Protein expressions in both the naïve and  
328 treatment group was normalized to GAPDH signals.

329

330

### 331 **Confocal analysis of septin disarrangement**

332 To determine the impact of UR214-9 treatment on Septin-2 structure in cells, PANC-1 or JIMT-1  
333 cells were seeded on glass slides and allowed to adhere overnight. The media was replaced with  
334 complete DMEM media supplemented with DMSO or UR214-9 (1 $\mu$ M and 70nM) and cells were  
335 incubated for 48 hours. Media was replaced again with new complete medium and fixed with  
336 neutral buffered formalin for 15 minutes at 4 $^{\circ}$ C. Media was removed and cells were washed  
337 repeatedly with PBST (5x 5mL). The cells were stained with Septin-2 antibody (Sigma Aldrich,  
338 catalog number: HPA018481) in PSB overnight at 4 $^{\circ}$ C. Media was removed again and cells were  
339 washed with 2x5mL PBST. The cells were stained with fluorescence linked secondary antibody  
340 for 1hr under dark. Slides were washed repeatedly in dark for 7x5mL PBST, mounting medium  
341 containing DAPI (Vector labs) were applied and covered with glass slide. The slides were stored  
342 in dark at 4 $^{\circ}$ C till analysis. Confocal images were obtained and processed essentially as published  
343 earlier<sup>34</sup>. Pancreatic tumor microarray (US Biomax, cat no: T142a) were deparaffinized,  
344 processed and stained with Septin-2 antibody (Sigma Aldrich, cat number: HPA018481) overnight,  
345 washed with PBST and incubated with source matched secondary (FITC) for an hour. Slide was  
346 washed in PBST (5x10mL) for five minutes each. DAPI containing mounting media was applied  
347 and covered with a glass slide. Confocal images were acquired with Nikon C1si confocal  
348 microscope (Nikon Inc. Mellville NY.) using diode lasers 402, 488 and 561. Serial optical sections  
349 were obtained with EZ-C1 computer software (Nikon Inc. Mellville, NY). Z series sections were  
350 collected at 0.3 $\mu$ m with a 40x PlanApo lens and a scan zoom of 2 or with a 60x Plan Apo objective  
351 and a scan zoom of 2, collected every 0.25  $\mu$ m. Deconvolution measurements were performed  
352 with Elements (Nikon Inc. Mellville, NY) computer software. Five cells were outlined and analyzed  
353 per field.

354

### 355 **Xenograft studies to evaluate antitumor response of UR214-9**

356 NSG mice were implanted in their left flank with 1 million PANC-1 (HER2+, n=12), JIMT1 (number  
357 of animals=10) and SKOV-3 (number of animals=10) cells each in matrigel:media (1:1). Mice  
358 were randomized, identified with ear punches and subdivided into vehicle and treatment groups  
359 when tumors were found palpable. Both JIMT1 and SKOV-3 formed aggressive tumors within a  
360 week and were treated with vehicle or UR214-9 (25mg/kg, IP, seven days a week). PANC-1  
361 formed slow growing tumors and when tumors reached length exceeding 5mm, the treatment was  
362 started. A group of SKOV-3 cells were also treated with Herceptin or Herceptin+UR214-9. The  
363 vehicle formulation was: 40% Hydroxypropyl-beta-cyclodextrin [Acros Organics] & solutol HS15  
364 (Sigma) in sterile water). 25mg/kg equivalent of UR214-9 (1uL=200ug in DMSO) was dissolved  
365 in 600uL PBS+400uL of the vehicle and vortexed to obtain a clear suspension. Tumor burden and  
366 animal weight was measured manually by digital calipers on weekly or biweekly routine. Tumor  
367 volume was calculated using the formula  $\frac{1}{2}(L \times W^2)$  where L is a longest diameter and W is the  
368 widest width. Statistical difference between the vehicle and treatment groups was analyzed by  
369 GraphPrism-8 software using one way annova. P<0.05 was considered significant. Mice after the  
370 treatment period were euthanized and tumors were resected, weighed and frozen in liquid  
371 nitrogen. A portion of the tumors from the control and treatment groups were fixed in neutral  
372 buffered formaldehyde and paraffin embedded. 5uM thickness tissues slides were prepared for  
373 histochemistry.

374

### 375 mRNA Sequencing

376 The total RNA concentration was determined with the NanopDrop 1000 spectrophotometer  
377 (NanoDrop, Wilmington, DE) and RNA quality assessed with the Agilent Bioanalyzer (Agilent,  
378 Santa Clara, CA)<sup>35</sup>. The TruSeq Stranded mRNA Sample Preparation Kit (Illumina, San Diego,  
379 CA) was used for next generation sequencing library construction per manufacturer's protocols.  
380 Briefly, mRNA was purified from 200ng total RNA with oligo-dT magnetic beads and fragmented.  
381 First-strand cDNA synthesis was performed with random hexamer priming followed by second-  
382 strand cDNA synthesis using dUTP incorporation for strand marking. End repair and 3`  
383 adenylation was then performed on the double stranded cDNA. Illumina adaptors were ligated to  
384 both ends of the cDNA, purified by gel electrophoresis and amplified with PCR primers specific to  
385 the adaptor sequences to generate cDNA amplicons of approximately 200-500bp in size. The  
386 amplified libraries were hybridized to the Illumina single end flow cell and amplified using the cBot  
387 (Illumina, San Diego, CA). Single end reads of 75nt were generated for each sample using  
388 Illumina's NextSeq550<sup>36</sup>.

389

390

### 391 Whole transcriptome data analysis

392 Raw reads generated from the NovaSeq6000 sequencer were demultiplexed using bcl2fastq  
393 version 2.19.0. Quality filtering and adapter removal are performed using Trimmomatic-0.36 with  
394 the following parameters: "TRAILING:13 LEADING:13 ILLUMINACLIP:adapters.fasta:2:30:10  
395 SLIDINGWINDOW:4:20 MINLEN:35" Processed/cleaned reads were then mapped to the *Homo*  
396 *sapiens* reference sequence (GRCh38, hg38) with STAR-2.6.0c given the following parameters:  
397 "--twopassMode Basic --runMode alignReads --genomeDir \${GENOME} --readFilesIn \${SAMPLE}  
398 --outSAMtype BAM SortedByCoordinate --outSAMstrandField intronMotif --outFilterIntronMotifs  
399 RemoveNoncanonical". The subread-1.6.1 package (featureCounts) was used to derive gene  
400 counts given the following parameters: "-s 2 -t exon -g gene\_name". Differential expression  
401 analysis and data normalization was performed using DESeq2-1.16.1 with an adjusted p-value  
402 threshold of 0.05 within an R-3.4.1 environment. Heatmaps were created using the pheatmap R  
403 package<sup>37-39</sup>.

404



## 405 **Data acquisition and statistical analysis**

406 The prognostic assessment of septin-2, -7 and -9 in the panel of different cancers was conducted  
407 using Human Protein Atlas tools. Alternatively, R2 genome.org tools were employed to determine  
408 the impact of septins enrichment on the survival prospects. P values less than 0.05 were  
409 considered significant. The relative tumor sizes in the naïve vs treat groups were calculated using  
410 GraphPrism8 using one-way annova settings. P values less than 0.05 were considered significant.

411

412

## 413 **Discussion**

414

415 Data continue to emerge on the association of septins with malignancies, making identification of  
416 septin-targeted therapies crucial to block the aberrant septin functions in cancer cells. Considering  
417 FCF that essentially strengthens septin-2<sup>40</sup> as the starting point, we have developed UR214-9, a  
418 small molecule which dismantles septin-2 and -9 filamental assembly in cancer cells without killing  
419 the cells or altering the septins protein levels in the cells. To our best knowledge, this is the first  
420 description of a pharmacologic approach to disrupt septin's structure in cells. We considered that  
421 disrupting oligomeric septin filamental structures via UR214-9 treatment will be the key to impact  
422 cytokinesis and control the proliferation of cancer cells. Not only did the disruption of septin  
423 filaments by UR214-9 reduce the proliferation of pancreatic cancer cells (and of breast, ovarian  
424 endometrial, lung and kidney cancers; some data not shown) in vitro, xenografted tumors of  
425 breast, ovarian, pancreatic and lung malignancies (data not shown) treated with UR214-9 also  
426 showed reduction in tumor growth. Interestingly, the combination with Herceptin led to stronger  
427 control over HER2 positive SKOV-3 xenograft's growth (Figure-6D).

428 Enhancement in antitumor effects of Herceptin via co-treatment with UR214-9 in HER2  
429 positive ovarian cancer xenograft model is stemming likely from the association of septin-2 with  
430 HER2. Septin-2 is shown to maintain HER2 signaling in cancer cells<sup>27</sup>. Septins protect and  
431 stabilize HER2 receptor at the plasma membrane of tumor cells to perpetuate the HER2  
432 orchestrated oncogenic signaling and tumorigenesis<sup>27</sup>. It is anticipated that targeting septins can  
433 improve the survival rate of HER2 positive breast, pancreatic and other malignancies such as  
434 ovarian and lung. HER2 overexpression leads to aggressive breast malignancy and poor patient  
435 survival<sup>41</sup>. Current repertoire of therapies for HER2+ malignancies are inadequate. More than 60%  
436 of HER2+ breast cancer patients do not respond to trastuzumab treatment and resistance to the  
437 treatment develops rapidly in virtually all patients<sup>42</sup>. Further, the inability of trastuzumab to  
438 penetrate solid breast tumors to block secreted (truncated) forms of HER2, that promote  
439 resistance and metastasis, limits its usefulness in providing a complete and lasting control over  
440 HER2 orchestrated breast tumor growth<sup>43</sup>. Similarly, treating or preventing brain metastases in  
441 patients with HER2+ breast cancer is challenging<sup>44</sup>, particularly in the post-trastuzumab phase of  
442 treatment. About two-thirds of patients develop brain metastases despite control or response of  
443 their extracranial disease to trastuzumab<sup>45</sup>. Because trastuzumab does not penetrate the central  
444 nervous system, the brain may serve as a sanctuary site<sup>46</sup>. A blood-brain barrier (BBB) penetrant  
445 drug would be required to better control brain metastases in patients with HER2 +positive cancers.  
446 UR214-9 carries the structural attributes of small polar surface area signatures (calculated for  
447 UR214-9=53.49 vs <90 required to cross BBB) that would facilitate penetration through the BBB.  
448 UR214-9, therefore, may improve outcomes of patients with brain metastases from HER2+  
449 cancers.

450 Signaling associations of septins are not fully understood. To determine signaling  
451 association of septins and perturbations that UR214-9 treatment mounts, we conducted global  
452 rna-seq analyses of breast and pancreatic cancer cells treated with UR214-9 and, as a  
453 comparator, afatinib, a HER2 targeted therapy. As shown in Figure-7, afatinib treatment clearly  
454 had the most impact on the transcriptional profile of PANC-1 cells, while treatment with DMSO  
455 and UR214-9 did not have much effect on the transcriptome. The lack of differentially expressed

456 genes between the UR214-9 treatment and control suggests that the mode of action of UR214-9  
457 is non-transcriptional, and treatment with UR214-9 does not appear to elicit a gross transcriptional  
458 response.

459 Taken together, this study demonstrates that aberrant septins expression indicates poor  
460 prognoses among patients with cancer. UR214-9 is the first prototype of a small molecule that  
461 can induce septin-2 and -9 filamental catastrophe, a pharmacologic and cytoskeletal response of  
462 the cells not described before, to control cancer cell proliferation and tumor growth. Moreover, an  
463 important pharmacologic feature of UR214-9 is the benefits of limited off-target engagements. As  
464 shown in Figure-7, compared to afatinib, an EGFR targeted therapy that affected gene expression  
465 of over 1200 genes in JIMT-1 breast cancer cells, UR214-9 treatment even at 100-fold higher  
466 dose affected less than 20 genes significantly. Although UR214-9 is a close structural analog of  
467 FCF, UR214-9 differs significantly from FCF pharmacologically. While FCF is shown to  
468 strengthen septin-2, UR214-9 dismantles septin-2 and septin-9 filamental assembly. ICM scores  
469 calculated through molecular docking indicated greater binding affinity of UR214-9 with septin-  
470 2:septin-2 dimer complex than FCF. To the best of our knowledge, other than FCF, which is  
471 clinically unfit due to the weak pharmacologic effects, off-target effects and functions associated  
472 with strengthening the septin-2 filaments, UR214-9 is the only septin modulator described so far  
473 that can dismantle septin's structural arrangement in nano molar concentrations (70nM-1uM).  
474 Given the preliminary antitumor response in breast, pancreatic, ovarian and lung cancer xenograft  
475 models (data not shown) and its therapeutic capabilities to significantly enhance the response of  
476 Herceptin in HER2 expressing xenograft tumors it is apparent that dismantling septins is an  
477 effective and clinically promising approach to prevent tumor growth, although doses, delivery  
478 formulations and frequencies of administrations have to be optimized, and a synergistic or at least  
479 an additive combinational agent has to be identified to achieve fuller control over the tumor growth.  
480 Based on the promising outcome in combination with Herceptin, our laboratory is currently  
481 evaluating the outcome of combination of UR214-9 with paclitaxel and Herceptin in breast cancer  
482 models to increase the clinical utilities of UR214-9.

483  
484  
485  
486  
487  
488  
489  
490  
491  
492  
493  
494  
495  
496  
497  
498  
499  
500  
501  
502  
503  
504  
505  
506

**Figures and figure legends:**

507  
508

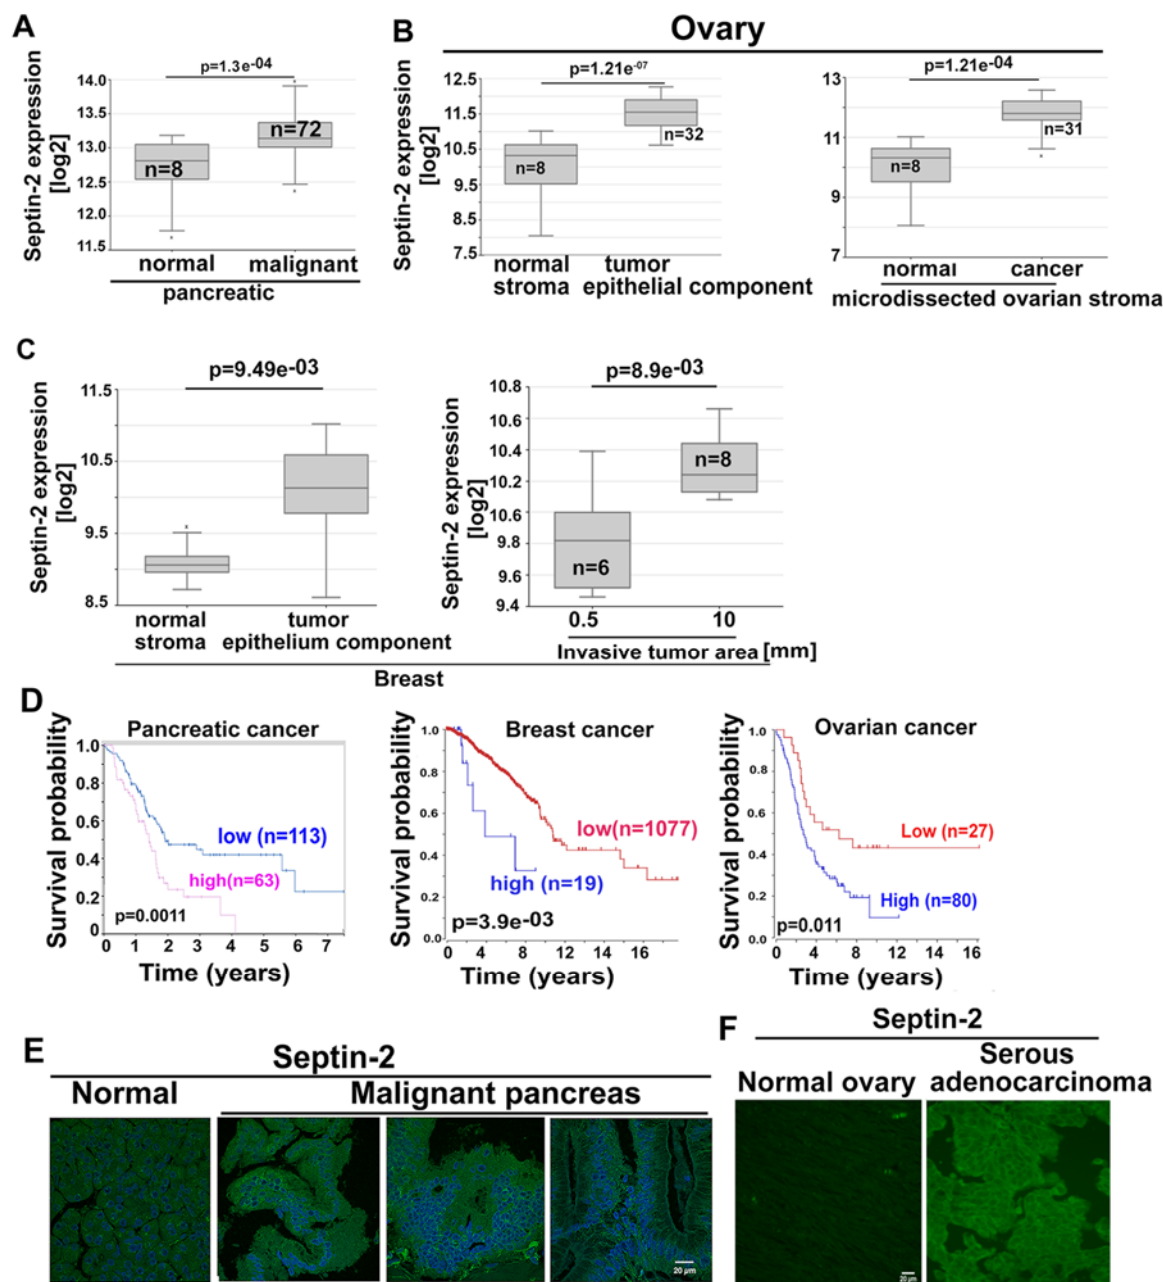

509  
510 **Figure-1: (A-C):** Septin-2 expression in normal and malignant pancreatic, ovarian and breast  
511 cancer tissues were analyzed using the publicly accessible patient's tumor microarray data  
512 deposited on R2-Genomics Analysis and Visualization Platform ([https://hgserver1.amc.nl/cgi-](https://hgserver1.amc.nl/cgi-bin/r2/main.cgi)  
513 [bin/r2/main.cgi](https://hgserver1.amc.nl/cgi-bin/r2/main.cgi)). (D): Kaplan Meier survival analyses of the pancreatic, ovarian and breast cancer  
514 cancer patients using the data and tools available at the Human Protein Atlas or at R2- R2-  
515 Genomics Analysis and Visualization Platform show that septin-2 enrichment correlates with  
516 decreased survival among pancreatic, breast and ovarian cancer patients. Septin-7 and -9  
517 enrichment was associated with increased mortality as well (see supplementary Figure-1). (E):  
518 Pancreatic Tumor microarray from US Biomax Inc (catalog number: T142a) was stained with  
519 septin-2 antibody (Sigma Aldrich Inc. catalog number: HPA018481), followed by sourced-

520 matched secondary antibody (DyLight-488, catalog number DI-1488, Vector laboratories Inc.).  
521 Imaged were recorded as described in the methods section. Malignant tissues showed higher  
522 septin-2 expression than tissues isolated from normal pancreas. **(F):** Malignant serous ovarian  
523 cancer tissues showed increased septin-2 expression than normal ovaries. Ovarian tumor  
524 microarray from US Biomax Inc (catalog OV241a) was stained with septin-2 antibody (Sigma  
525 Aldrich catalog number: HPA018481) followed by a sourced-matched secondary antibody  
526 (DyLight-488, catalog number DI-1488, Vector laboratories Inc.). Imaged were acquired as  
527 described in method section.

528  
529  
530  
531  
532  
533  
534  
535  
536  
537  
538  
539  
540  
541  
542  
543  
544



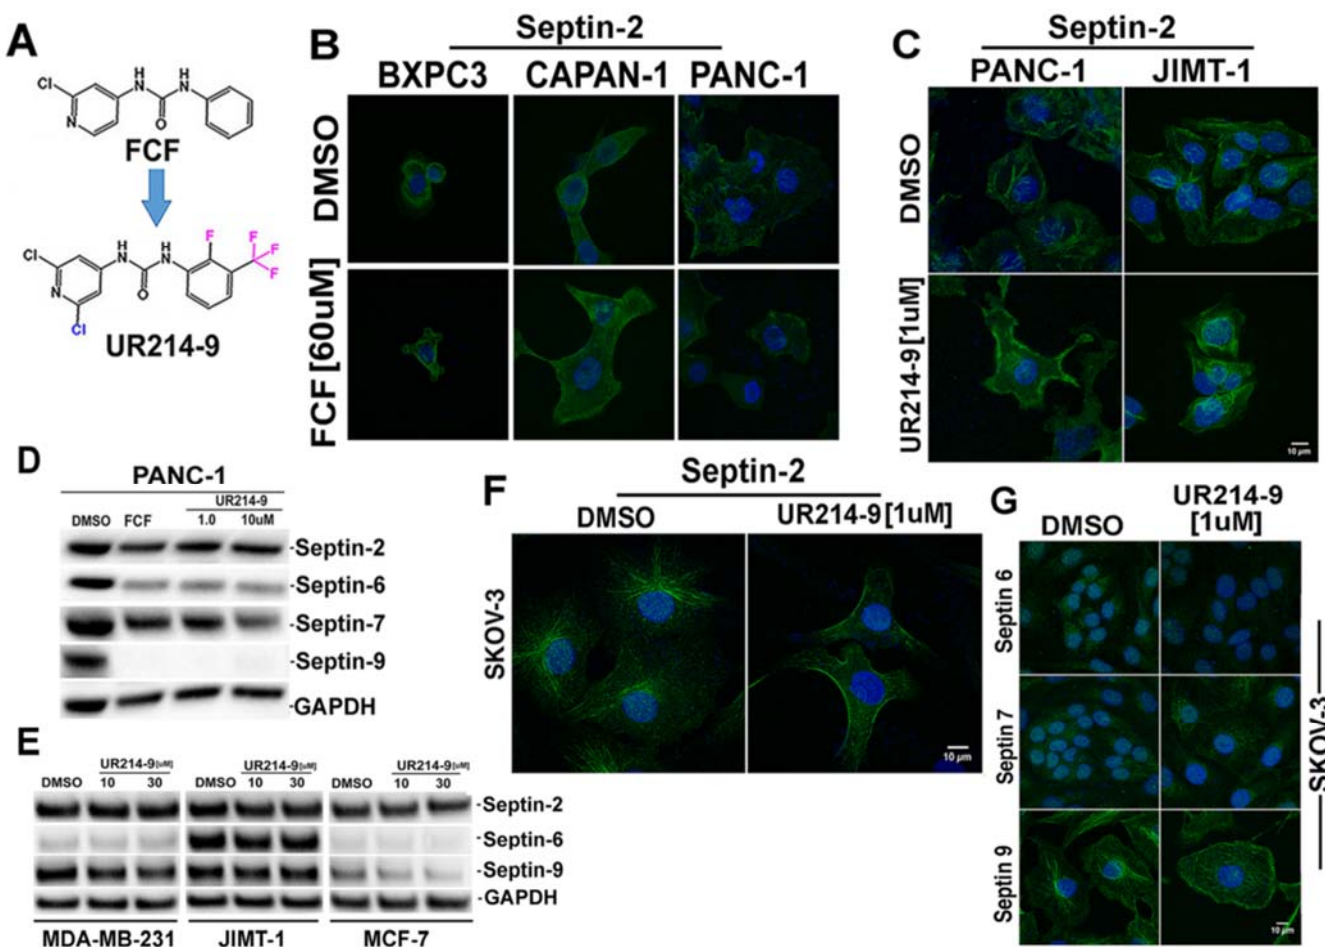

545  
546

**Figure-2:** (A): Chemical structure of FCF and UR214-9. Structural changes to FCF leading to UR214-9 are shown in blue and pink color. (B): BXPC-3, CAPAN-1 and PANC-1 cells were seeded on glass slides and treated with DMSO or FCF(60uM) for 48 hours. The cells were fixed, processed and stained with validated septin-2 antibody (Sigma Aldrich Inc. Catalog number: HPA018481) and source matched secondary antibody (DyLight 488, Vector Laboratories Inc., catalog number: DI-1488), and confocal images were recorded at 60x2 magnification. (C): PANC-1 and JIMT-1 seeded on glass chamber slides cells were treated with DMSO (vehicle) or UR214-9 (1uM) for 48 hrs. Cells were fixed, permeabilized and stained with septin-2 antibody (Sigma Aldrich Inc. Catalog number: HPA018481) and DyLight 488 conjugated secondary antibody (Vector Laboratories Inc., catalog number: DI-1488), and confocal images were recorded at 60x2 magnification. (D): PANC-1 cells were seeded in 100mm3 dishes and treated with DMSO, FCF(60uM), UR214-9 (1.0 and 10.0 uM) for 48 hours. Total cells lysates were immunoblotted and probed with the validated septin-2 (Sigma Aldrich Inc. Catalog number: HPA018481), 6 (Sigma Aldrich Inc. Catalog number: HPA005665), 7(Sigma Aldrich Inc. Catalog number: HPA029524) and -9 (Sigma Aldrich Inc. Catalog number: HPA042564) antibodies. (E): MDA-MT-231, JIMT-1 and MCF-7 cells seeded in 100mm3 petri dishes were treated with DMSO or UR21409(10 and 30uM) for 48 hours. The total cell lysates were immunoblotted and probed with validated septin-2 (Sigma Aldrich Inc. Catalog number: HPA018481), 6 (Sigma Aldrich Inc. Catalog number: HPA005665) and -9 (Sigma Aldrich Inc. Catalog number: HPA042564) antibodies. (F-G): SKOV-3 ovarian cancer cells seeded on glass chamber slides cells were treated with DMSO (vehicle) or UR214-9 (1uM) for 48 hrs. Cells were fixed, permeabilized and stained with validated septin-2 (Sigma Aldrich Inc. Catalog number: HPA018481), 6 (Sigma Aldrich Inc. Catalog number:

569 HPA005665), 7(Sigma Aldrich Inc. Catalog number: HPA029524) and -9 (Sigma Aldrich Inc.  
570 Catalog number: HPA042564) antibodies followed by DyLight 488 conjugated secondary  
571 antibody (Vector Laboratories Inc., catalog number: DI-1488), and confocal images were recorded  
572 at 60x2 magnification.

573

574

575

576

577

578

579

580

581

582

583

584

585

586

587

588  
589  
590  
591  
592  
593  
594  
595  
596  
597  
598  
599  
600  
601  
602  
603  
604  
605  
606  
607  
608  
609  
610  
611  
612  
613  
614  
615  
616  
617  
618  
619  
620  
621  
622  
623  
624  
625  
626  
627  
628  
629

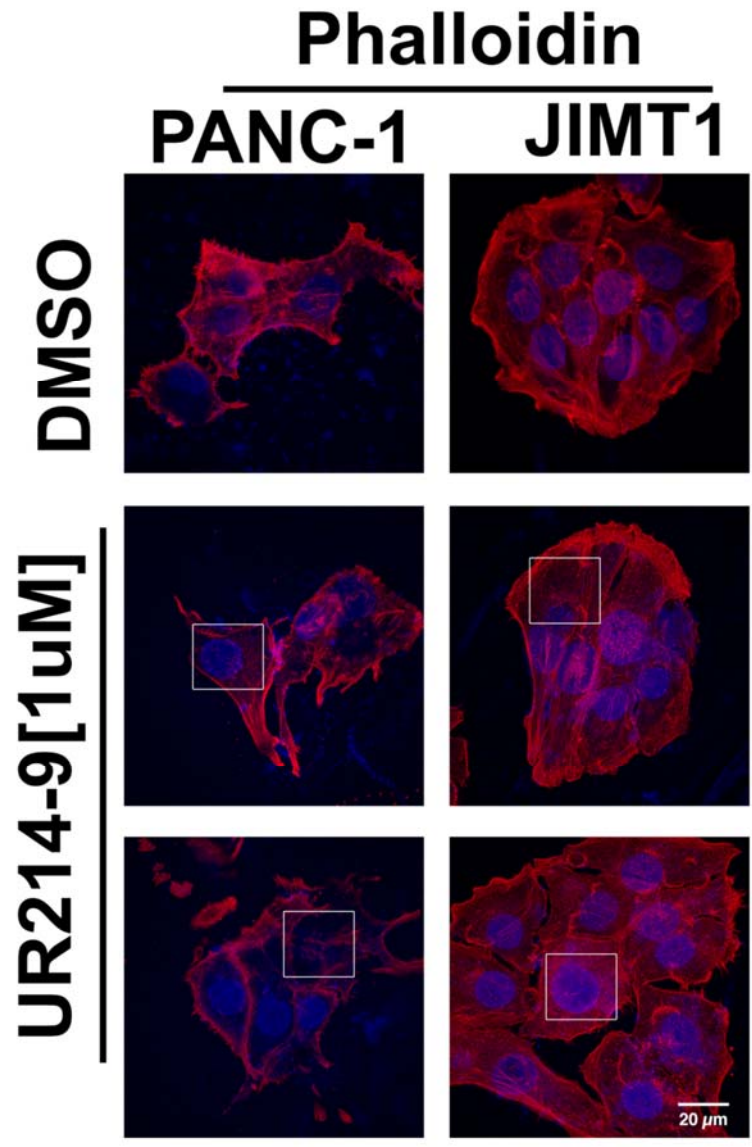

**Figure-3:** PANC-1 pancreatic cancer cells and JIMT-1 breast cancer cells were treated with vehicle or UR214-9 (1μM) for 48-hour duration, fixed, permeabilized and stained with Phalloidin-TRITC (ECM Biosciences Inc., catalog number: PF7551). Confocal images were recorded at 60x2 magnification. Areas of interest are shown by white boxes.





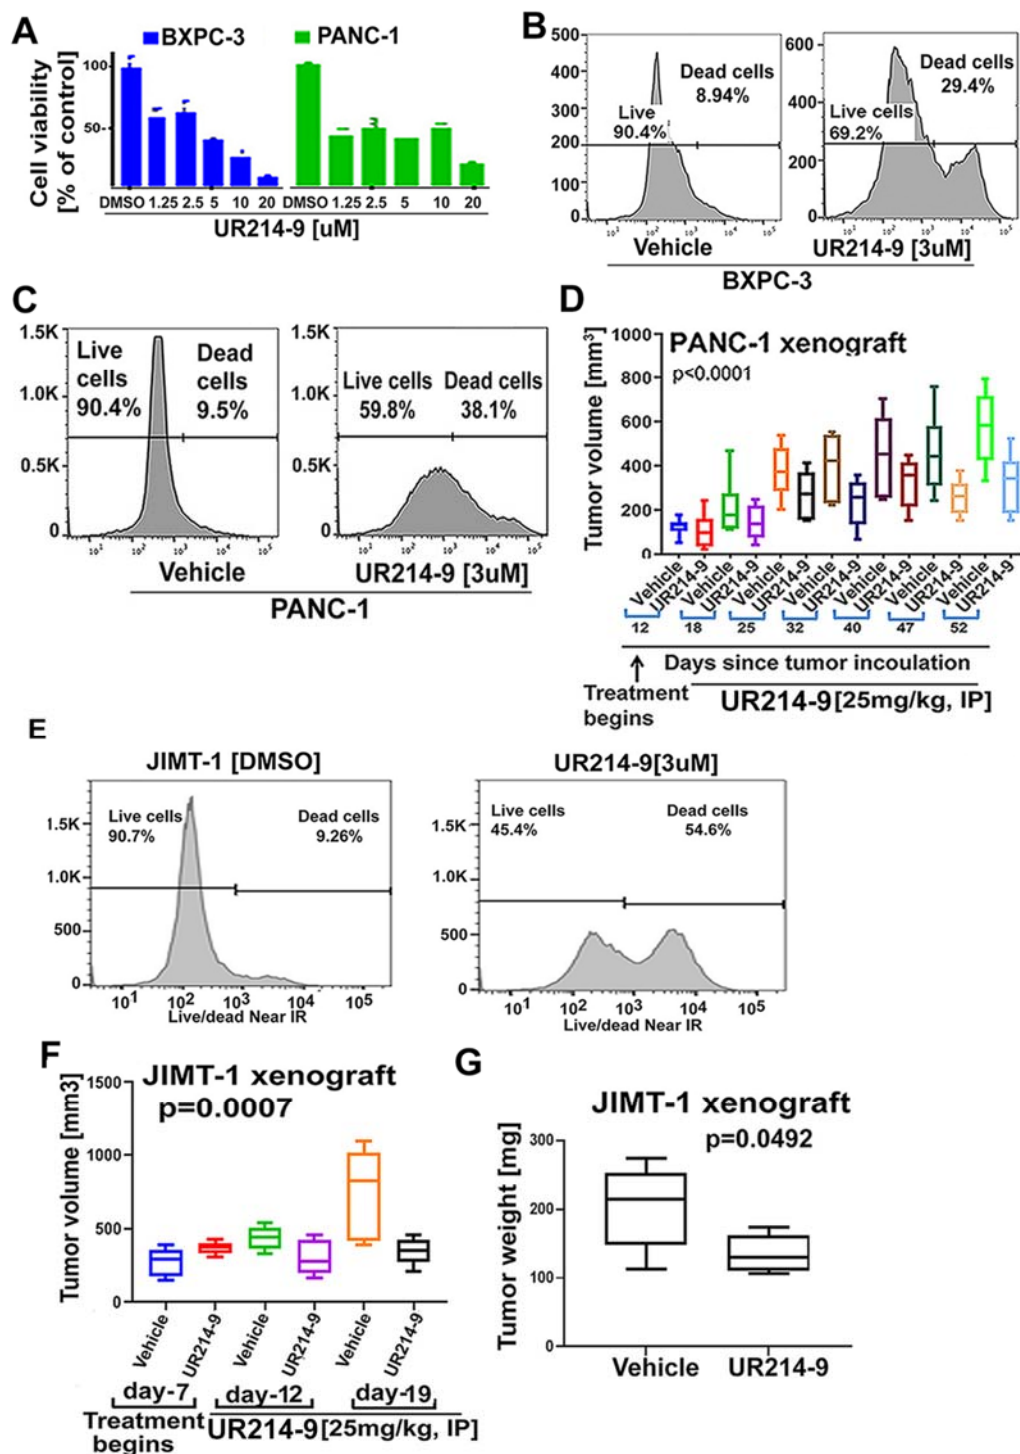

651 **Figure-5:** (A): Cell viability of PANC-1 and BXPC-3 cells treated with UR214-9 (DMSO, 1.25, 2.5,  
 652 5, 10 and 20uM) for 72 hours. The cell viability of the treated groups in comparison with DMSO  
 653 group was assessed by use of MTS assay (Promega Corp. catalog number: G3580) and  
 654 absorbance was read at 490nm using BioRad microplate reader. (B-C): PANC-1 and BXPC-3  
 655 cells were treated with UR214-9(3uM) or DMSO for 48 hours. The cells were stained with  
 656 Live/dead near IR dye and the live and dead population in vehicle and control group was  
 657 estimated by flow-cytometry. (D): NSG mice (n=10) were inoculated with PANC-1 cells (1

658 million/animal). Once tumors were palpable, mice were divided into two groups of n=5 each and  
659 treated with vehicle or UR214-9 (25mg, M-F, IP, once daily) for 52 days. The tumor sizes were  
660 measured periodically. **(E)**: JIMT1 cells were treated with UR214-9(3uM) or DMSO for 48 hours.  
661 The cells were stained with Live/dead near IR dye and the live and dead population in vehicle and  
662 control group was estimated by flow-cytometry. **(F)**: NSG mice (n=10) were inoculated with JIMT1  
663 cells (1 million/animal). Once tumors were palpable, mice were divided into two groups of n=5  
664 each and treated with vehicle or UR214-9 (25mg, M-F, IP, once daily) for 28 days. The tumor  
665 sizes were measured periodically. **(G)**: Tumors from both animals of the control and treatment  
666 groups were harvested and weighed on a calibrated balance. Statistical analysis was carried out  
667 using GraphPad Prism 8 software. A P value less than 0.05 was considered significant.

668  
669  
670  
671  
672  
673  
674  
675  
676  
677  
678  
679  
680  
681  
682  
683  
684  
685  
686  
687  
688  
689  
690  
691  
692  
693  
694  
695  
696  
697  
698  
699  
700  
701  
702  
703  
704  
705  
706  
707  
708

709

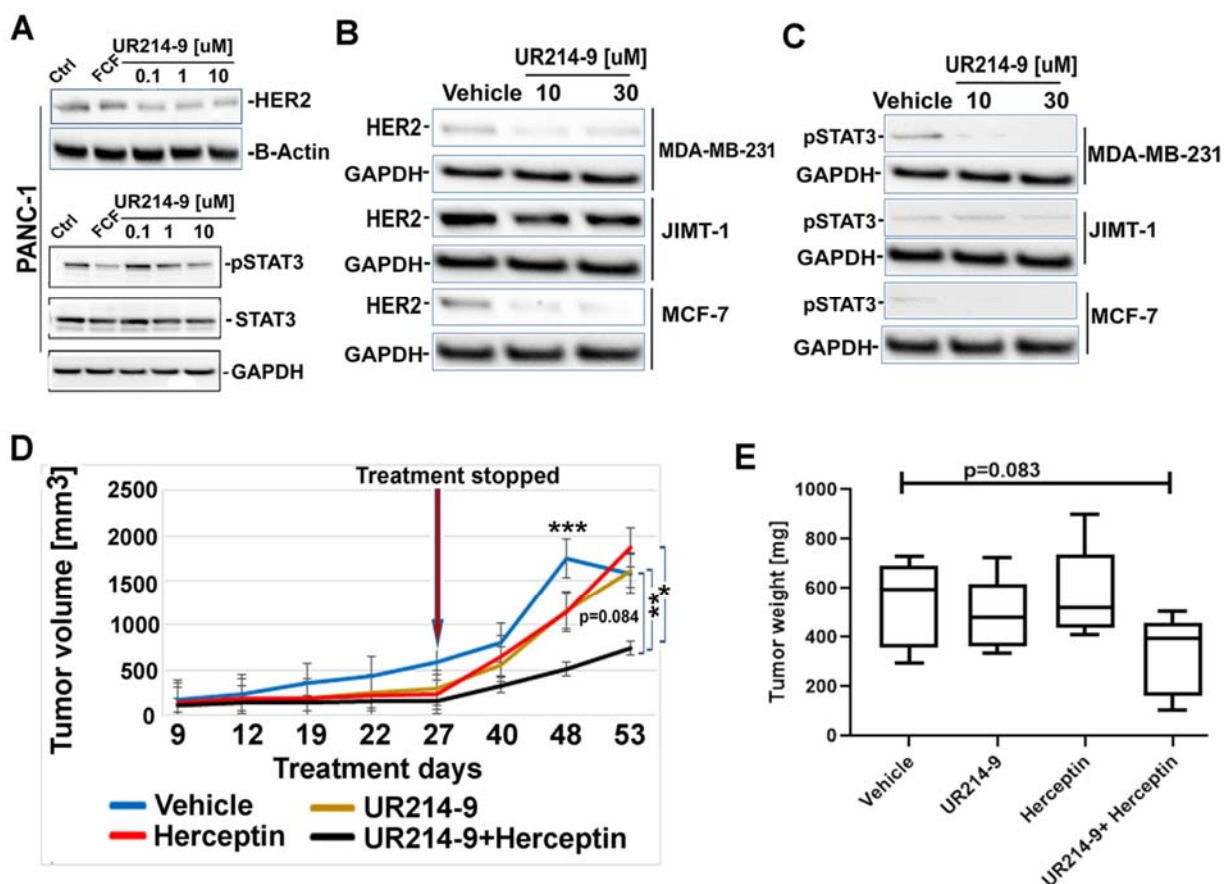

710  
 711 **Figure-6: (A-B):** Adhered BXP-3, and PANC-1 cells were treated with FCF(60uM) and UR214-  
 712 9 (DMSO, 0.1, 1.0 and 10uM) for 48 hours. Cells were lysed and immunoblotted with HER2 (Cell  
 713 Signaling Technology Inc., catalog number: 4290); pSTAT-3 (Cell Signaling Technology Inc.,  
 714 catalog number: 9145p), STAT-3 (Cell Signaling Technology Inc., catalog number: 4904), AKT  
 715 (Cell Signaling Technology Inc., catalog number: 9272) and GAPDH antibodies (Cell Signaling  
 716 Technology Inc., catalog number: 2118s). (C): MDA-MB-231, JIMT-1 and MCF-7 cells were  
 717 treated with DMSO or UR214-9 (10 and 30µM) for 24 hours. The cells were lysed, immunoblotted  
 718 and probed with HER2 (Cell Signaling Technology Inc, catalog number: 4290) and phospho-  
 719 STAT-3 (Cell Signaling Technology Inc., catalog number: 9145p) antibodies. (D): HER2  
 720 expressing SKOV-3 cells (500,000 cells/animals) were implanted in the right flanks of NSG mice  
 721 subcutaneously. When palpable, mice in groups (n=5 each) were treated with vehicle, UR214-9  
 722 (25mg/kg, M-F, I.P.), Herceptin (10mg/kg, M, I.P.). Fourth group was treated with both UR214-9  
 723 (25mg/kg, M-F, I.P.) and Herceptin (10mg/kg, M, I.P). Tumor sizes were measured on regular  
 724 intervals using a digital caliper. Longest length and width were recorded. Tumor volumes was  
 725 calculated using formula  $(L*W^2)*0.5$  where L represents longest diameter and W stands for width  
 726 of the tumors measured through a digital caliper. Treatment was stopped on day-27<sup>th</sup> and tumor  
 727 sizes were measured on the days indicated. On the day-53<sup>rd</sup> since inoculation, mice were  
 728 euthanized and tumors were harvested. Tumor weights were recorded using a calibrated balance.  
 729 The statistical analyses were performed using Graph Prims 8.1.1.T-test analyses among groups  
 730 were performed using Graph Prism 8.1.1. version and  $p < 0.05$  was considered significant. Day-  
 731 22: vehicle vs UR214-9:  $p=0.0035^{**}$ ; vehicle vs Herceptin:  $p=0.0011^{**}$ ; vehicle vs UR214-  
 732 9+Herceptin:  $p=0.0001^{***}$ ; UR214-9 vs UR214-9+Herceptin:  $p=0.0059^{**}$ ; Herceptin vs UR214-

733 9+Herceptin:  $p=0.049^*$ . Day-27: vehicle vs UR214-9:  $p=0.0004^{***}$ ; vehicle vs Herceptin:  
734  $p=0.0002^{***}$ ; vehicle vs UR214-9+Herceptin:  $p<0.0001^{****}$ .  
735  
736  
737  
738  
739  
740  
741  
742  
743  
744  
745  
746  
747  
748  
749  
750  
751  
752  
753



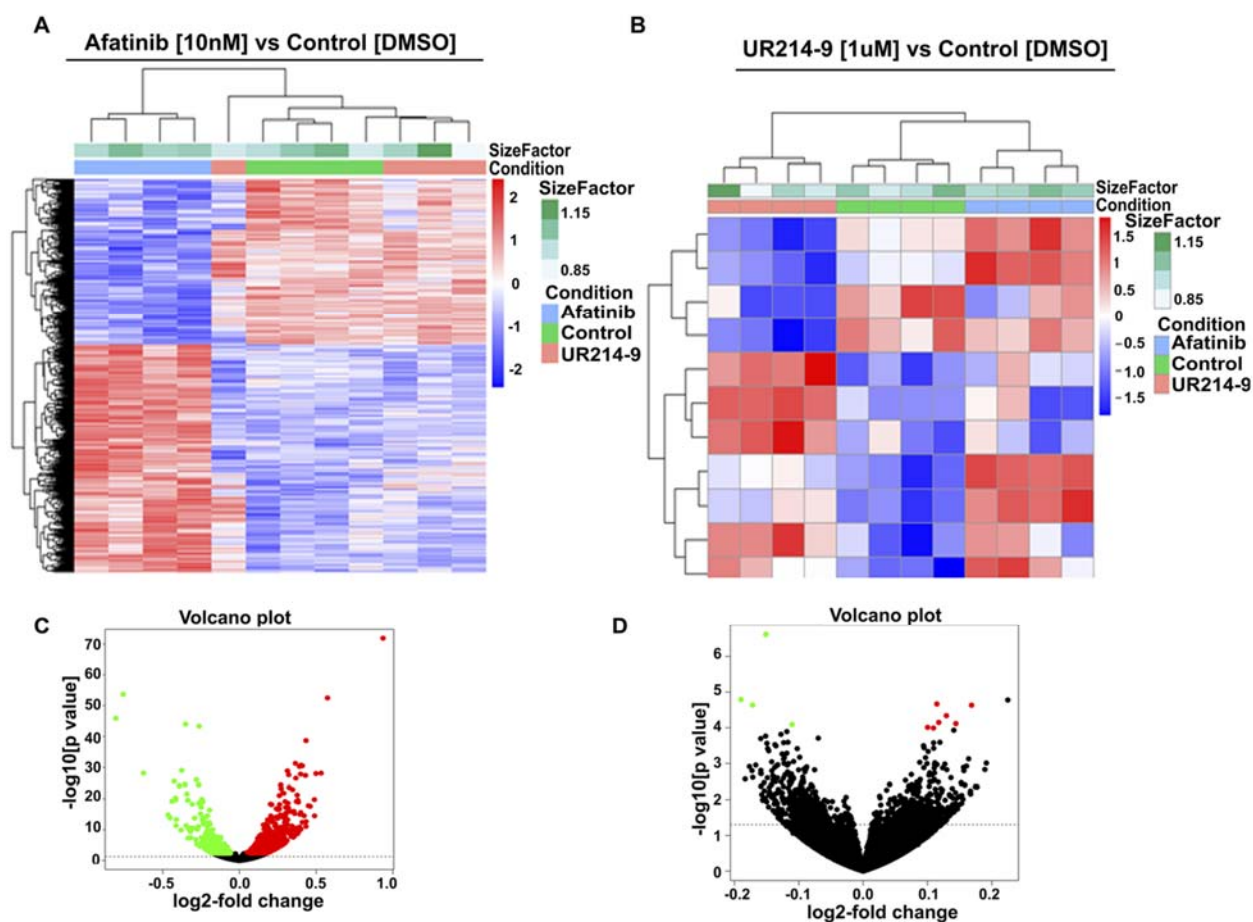

754 **Figure-7:** Hierarchically clustered heat map of mRNA expression for 1234 significantly  
755 differentially expressed genes (BH adjusted p-value < 0.05) in the JIMT-1 breast cancer cells  
756 treated with afatinib compared to control (**A**) and associated volcano plot (**C**). Hierarchically  
757 clustered heat map of mRNA expression for 11 significantly differentially expressed genes (BH  
758 adjusted p-value < 0.05) in the JIMT-1 breast cancer cells treated with UR214-9 compared to  
759 control (**B**) and associated volcano plot (**D**). Heatmap color key represents row scaling of the rLog  
760 transformed expression values. The volcano plots have horizontal lines at p-value 0.05 and  
761 individual genes/dots are colored red when the adjusted p-value is  $\geq 0.05$  and the fold-change  
762 is  $> 0$  and green when the fold-change is  $< 0$ .

763  
764  
765  
766  
767  
768  
769  
770  
771  
772  
773  
774

775 **Supplementary Figures:**

776

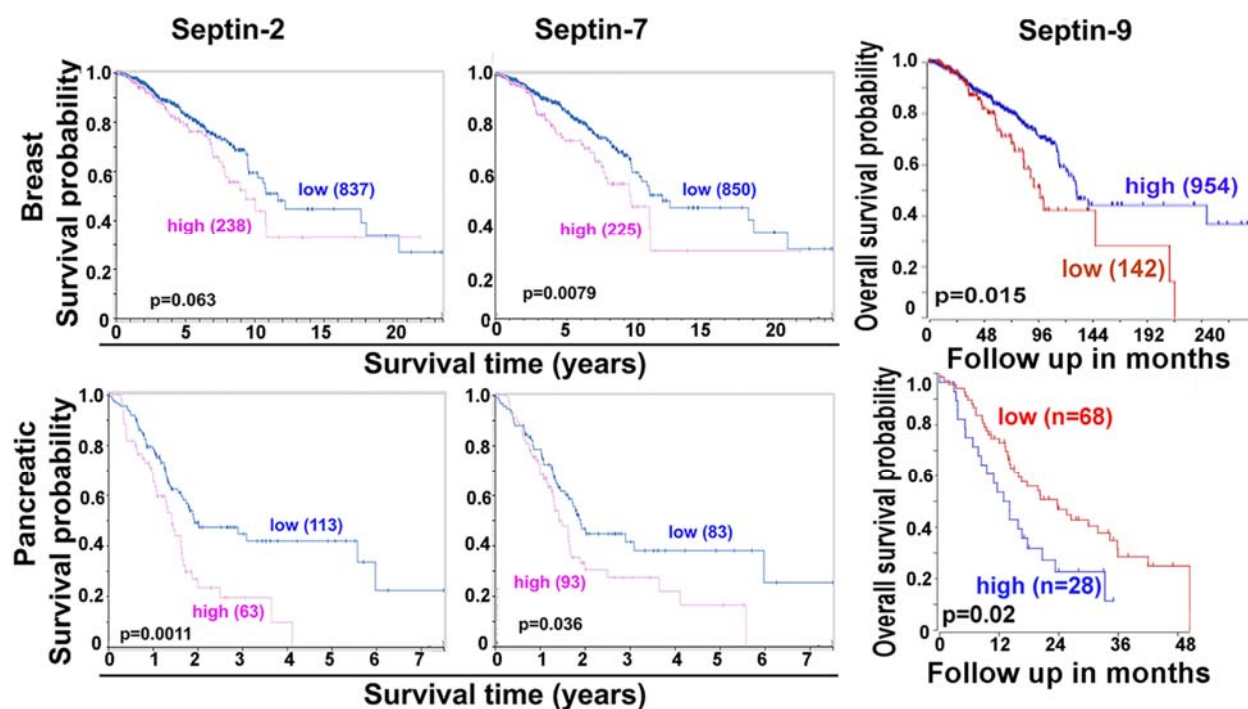

777

778

779 **Supplementary Figure-1:** Survival probabilities of patients diagnosed with breast and pancreatic,  
780 was correlated with septin-2 (left), septin-7 (middle) and septin-9 (right) gene expression using  
781 the data and tools available at the Human Protein Atlas (<https://www.proteinatlas.org/>) or R2-  
782 Genomics Analysis and Visualization Platform (<https://hgserver1.amc.nl/cgi-bin/r2/main.cgi>). P  
783 values less than 0.05 were considered significant.

784

785

786

787

788

789

790

791

792

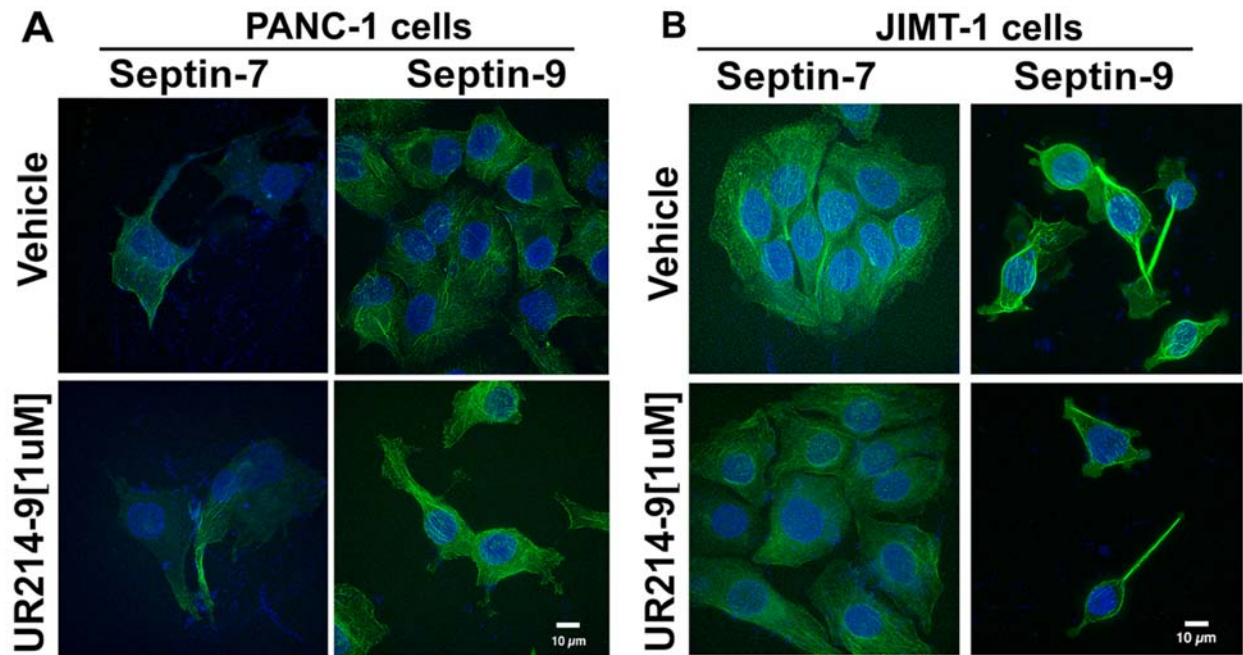

793  
794  
795  
796  
797  
798  
799  
800  
801  
802  
803

**Supplementary Figure-2:** PANC-1 and JIMT1 cells were treated with DMSO or UR214-9 (1 $\mu$ M) for 48 hrs. Cells were fixed, permealized and stained with septin-7 and -9 antibodies (Sigma Aldrich Inc., catalog number: HPA029524, HPA042564) and DyLight 488 conjugated secondary antibody (Vector Laboratories Inc., catalog number: DI-1488), and confocal images were recorded at 60x2 magnification.

804  
805  
806  
807  
808  
809  
810  
811  
812  
813  
814  
815  
816  
817  
818  
819  
820  
821  
822  
823  
824  
825  
826  
827  
828  
829  
830  
831

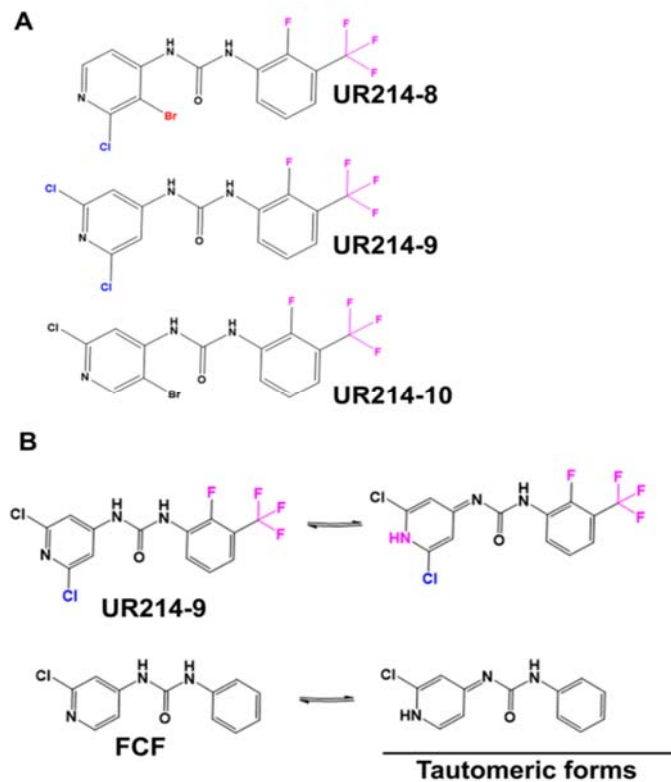

**Supplementary Figure-3: (A):** Chemical structures of UR214-9 analogs employed in molecular docking. **(B):** Possible tautomeric forms of UR214-9 and FCF.

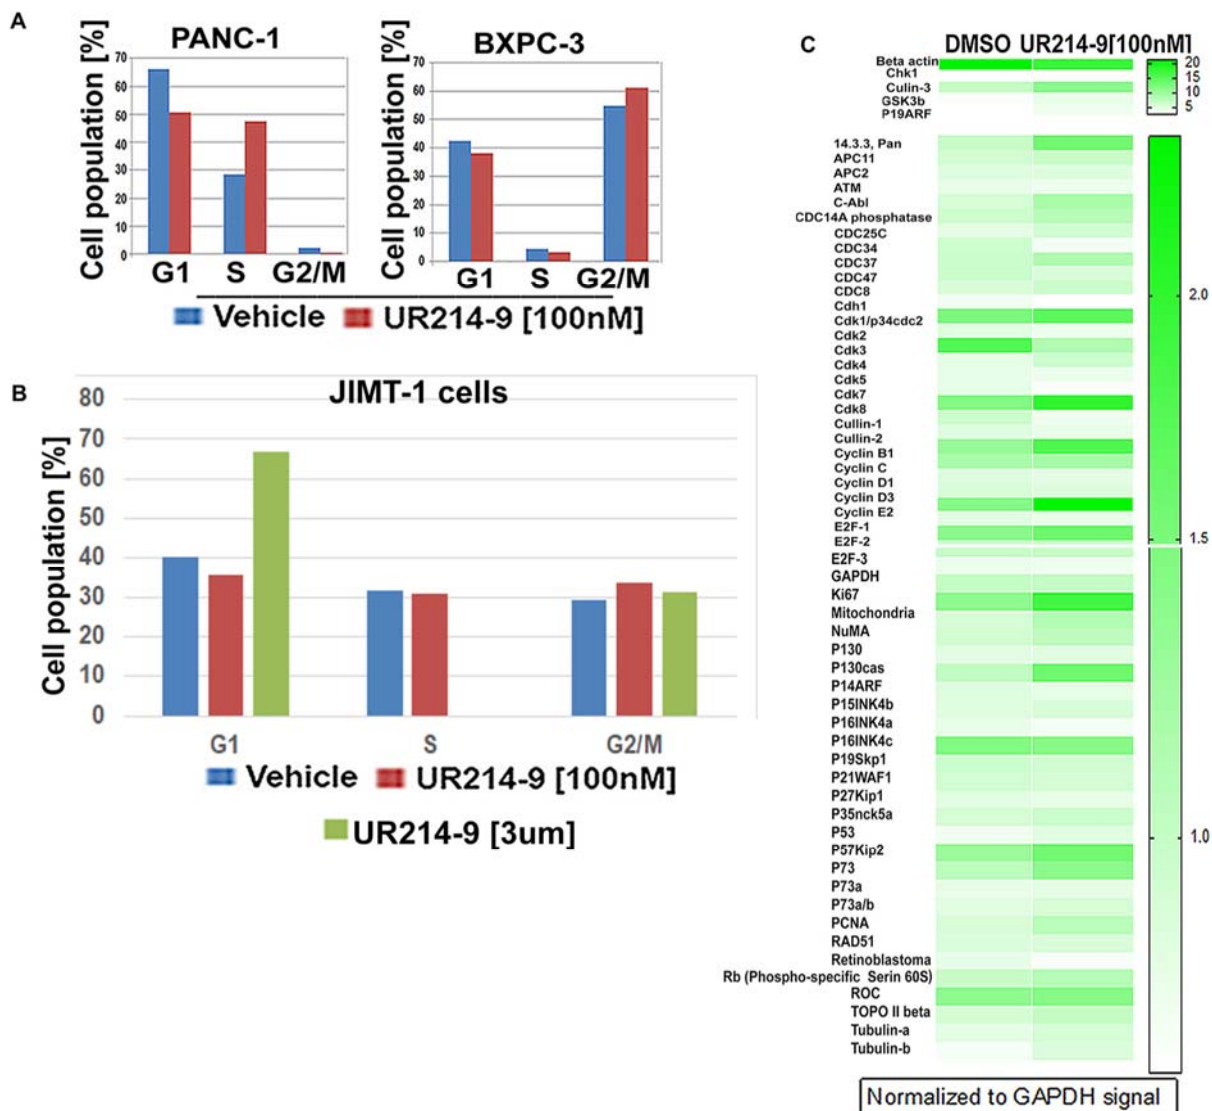

832  
 833  
 834 **Supplementary Figure-4:** (A): PANC-1 and BXPC-3 cells were treated with sub-cytotoxic  
 835 concentrations of UR214-9 (100nM for 48 hours). Cells were fixed, permeabilized and stained  
 836 with pre-formulated PI-RNase solution (Cell Signaling Technology, catalog number 4087s). DNA  
 837 content was measured using flow-cytometry and cell cycle distribution was analyzed by flowjo or  
 838 FCF express software. (B): JIMT1 cells were treated with [(DMSO, UR214-9 (0, 100nM-3µM)]  
 839 for 48 hours, fixed, permeabilized and stained with pre-formulated PI-RNase solution (Cell  
 840 Signaling Technology, catalog number 4087s). DNA content was measured using flow-cytometry  
 841 and cell cycle distribution was analyzed by flowjo software. (C): PANC-1 cells were treated with  
 842 DMSO or UR214-9 (100nM) or 3µM for 48 hours. The cells were lysed and total protein was  
 843 isolated using the buffer available in FullMoon Bioscience Cell Cycle Antibody array kit (catalog  
 844 number: ASC058). The proteins isolated from the vehicle and treatment groups were applied on  
 845 the antibody array, and processed and developed per the manufacturer's instructions. The  
 846 photons were read using the array Image Quantification and Analysis services of FullMoon  
 847 BioSciences (Catalog number SDA01-ACC058) and normalized to GAPDH. Cullin-3, GSK3b and  
 848 p19ARF followed by Pan 14.3.3 were the most upregulated proteins in the treatment groups.  
 849 Heatmap shows fold-changes in protein expressions.



850 **Availability of data and UR214-9:**

851 The complete set of in vitro and in vivo results, rna-seq and western blot data are available from  
852 the corresponding author upon request. Similarly, reasonable quantities of UR214-9 will be freely  
853 made available for research and studies upon request.

854

855

856 **Reference**

857

- 858 1. Dolat, L., Hunyara, J.L., Bowen, J.R., Karasmanis, EP., Elgawly, M., Galkin, V.E.,  
859 Spiliotis, E.T. Septins promote stress fiber-mediated maturation of focal adhesions and  
860 renal epithelial motility. *J Cell Biol.* **207**,225-35(2014).
- 861 2. Mostowy, S. and P. Cossart, *Septins: the fourth component of the cytoskeleton.* *Nat Rev*  
862 *Mol Cell Biol.* **13**,183-94(2012).
- 863 3. Tokhtaeva, E., Capri, J., Marcus, E.A., Whitelegge, J.P., Khuzakhmetova, V.,  
864 Bukharaeva, E., Deiss-Yehiely, N., Dada, L.A., Sachs, G., Fernandez-Salas, E, Vagin,  
865 O. *Septin dynamics Septin dynamics are essential for exocytosis.* *J Biol Chem.*  
866 **290**,5280-97(2015).
- 867 4. Kartmann, B. and D. Roth, *Novel roles for mammalian septins: from vesicle trafficking to*  
868 *oncogenesis.* *J Cell Sci.* **114**(Pt 5),839-44 (2001).
- 869 5. Caudron, F. and Y. Barral, *Septins and the lateral compartmentalization of eukaryotic*  
870 *membranes.* *Dev Cell.* **16**,493-506(2009).
- 871 6. Bridges, A.A. and A.S. Gladfelter, *Septin Form and Function at the Cell Cortex.* *J Biol*  
872 *Chem.* **290**,17173-80(2015).
- 873 7. Pagliuso, A., Tham, T.N., Stevens, J.K., Lagache, T., Persson, R., Salles, A., Olivo-  
874 Marin, JC, Oddos, S., Spang, A., Cossart, P., Stavru, F. *A role for septin 2 in Drp1-*  
875 *mediated mitochondrial fission.* *EMBO Rep.* **17**,858-73(2016).
- 876 8. Sirianni, A., Krokowski, S., Lobato-Márquez, D., Buranyi, S., Pfanzelter, J., Galea, D.,  
877 Willis, A., Culley, S., Henriques, R., Larrouy-Maumus, G., Hollinshead, M., Sancho-  
878 Shimizu V., Way, M., Mostowy, S. *Mitochondria mediate septin cage assembly to*  
879 *promote autophagy of Shigella.* *EMBO Rep.* **17**,1029-43(2016).
- 880 9. Mostowy, S., Bonazzi, M., Hamon, M.A., Tham, T.N., Mallet, A., Lelek, M., Gouin, E.,  
881 Demangel, C., Brosch, R., Zimmer, C., Sartori, A., Kinoshita, M., Lecuit, M., Cossart, P.  
882 *Entrapment of intracytosolic bacteria by septin cage-like structures.* *Cell Host Microbe.*  
883 **8**,433-44(2010).
- 884 10. Traikov, S., Stange, C., Wassmer, T., Paul-Gilloteaux, P., Salamero, J., Raposo, G.,  
885 Hoflack, Bernard. *Septin6 and Septin7 GTP binding proteins regulate AP-3- and*  
886 *ESCRT-dependent multivesicular body biogenesis.* *PLoS One.* **9**(11), e109372(2014).
- 887 11. Dolat, L. and E.T. Spiliotis, *Septins promote macropinosome maturation and traffic to the*  
888 *lysosome by facilitating membrane fusion.* *J Cell Biol.* **214**,517-27(2016).
- 889 12. Russell, S.E., Hall, P.A. *Do septins have a role in cancer?* *Br J Cancer.* **93**,499-  
890 503(2005).
- 891 13. Hall, P.A., Russell, S.E. *The pathobiology of the septin gene family.* *J Pathol.* **204**,489-  
892 505(2004).
- 893 14. Cerveira, N., S. Bizarro, and M.R. Teixeira, *MLL-SEPTIN gene fusions in hematological*  
894 *malignancies.* *Biol Chem.* **392**,713-24(2011).
- 895 15. Connolly, D., et al., *Septin roles in tumorigenesis.* *Biol Chem.* **392**,725-38 (2011).
- 896 16. Angelis, D. and E.T. Spiliotis, *Septin Mutations in Human Cancers.* *Front Cell Dev Biol.*  
897 **4**:122 (2016).
- 898 17. Dolat, L., Q. Hu, and E.T. Spiliotis, *Septin functions in organ system physiology and*  
899 *pathology.* *Biol Chem.* **395**,123-41(2014).

- 900 18. Marttinen, M., Kurkinen, K.M., Soininen, H., Haapasalo, A., Hiltunen, M. Synaptic  
901 dysfunction and septin protein family members in neurodegenerative diseases. *Mol*  
902 *Neurodegener.* **10**,16 (2015).
- 903 19. Calvo, F., Ranftl, R., Hooper, S., Farrugia, A.J., Moeendarbary, E., Bruckbauer, A.,  
904 Batista, F., Charras, G., Sahai, E. *Cdc42EP3/BORG2 and Septin Network Enables*  
905 *Mechano-transduction and the Emergence of Cancer-Associated Fibroblasts.* *Cell Rep.*  
906 **13**,2699-714(2015).
- 907 20. <https://hqsserver1.amc.nl/cgi-bin/r2/main.cgi>
- 908 21. Uhlén, M et al. Tissue-based map of the human proteome. *Science* **347**,1260419 (2015).
- 909 22. Schmidt, K., Nichols, B.J. Functional interdependence between septin and actin  
910 cytoskeleton. *BMC Cell Biol.***12**,43 (2004).
- 911 23. Angelis, D., et al., *In silico docking of forchlorfenuron (FCF) to septins suggests that FCF*  
912 *interferes with GTP binding.* *PLoS One.* **9**,e96390 (2014).
- 913 24. Pintard, L., Willems, A., Peter, M. Cullin-based ubiquitin ligases: Cul3-BTB complexes  
914 join the family. *EMBO J.* **23**,1681-7(2004).
- 915 25. Kumar, V., Abbas, A., Aster, J. Robbins basic pathology. Philadelphia:  
916 Elsevier/Saunders. 2013; p. 697. ISBN 9781437717815.
- 917 26. Buza, N., Roque, DM., Santin, AD. "HER2/neu in Endometrial Cancer: A Promising  
918 Therapeutic Target With Diagnostic Challenges". *Archives of Pathology & Laboratory*  
919 *Medicine.***138**,343-50(2014).
- 920 27. Rüschoff, J., Hanna, W., Bilous, M., Hofmann, M., Osamura, R.Y., Penault-Llorca, F.,  
921 van de Vijver, M., Viale, G. "HER2 testing in gastric cancer: a practical approach".  
922 *Modern Pathology.* **25**:637-50(2012).
- 923 28. Ruiz-Saenz, A., Dreyer, C., Campbell, M.R., Steri, V., Gulizia, N., Moasser, M.M. HER2  
924 Amplification in Tumors Activates PI3K/Akt Signaling Independent of HER3. *Cancer*  
925 *Res.***78**,3645-3658(2018).
- 926 29. Marcus, E.A., Tokhtaeva, E., Turdikulova, S., Capri, J., Whitelegge, J.P., Scott, D.R., Sachs, G.,  
927 Berdichevski, F., Vagin, O. Septin oligomerization regulates persistent expression of  
928 ErbB2/HER2 in gastric cancer cells. *Biochem J.* **473**,1703-18 (2016).
- 929 30. James, N.E., Cantillo, E., Yano, N., Chichester, C.O., DiSilvestro, .PA., Hovanesian, V.,  
930 Rao, R.S.P., Kim, K.K., Moore, R.G., Ahsan, N., Ribeiro, J.R. Septin-2 is overexpressed  
931 in epithelial ovarian cancer and mediates proliferation via regulation of cellular metabolic  
932 proteins. *Oncotarget.* **10**,2959-2972(2019).
- 933 31. DeFazio-Eli, L., Strommen, K., Dao-Pick, T., Parry, G., Goodman, L., Winslow, J.  
934 Quantitative assays for the measurement of HER1-HER2 heterodimerization and  
935 phosphorylation in cell lines and breast tumors: applications for diagnostics and targeted  
936 drug mechanism of action. *Breast Cancer Res.***13**(2),R44 (2011).
- 937 32. English, D.P., Roque, D.M., Santin, A.D. HER2 expression beyond breast cancer:  
938 therapeutic implications for gynecologic malignancies. *Mol. Diagn. Ther.* **17**,85-99  
939 (2013).
- 940 33. Chung, S.S., Giehl, N., Wu, Y., Vadgama, J.V. STAT3 activation in HER2-  
941 overexpressing breast cancer promotes epithelial-mesenchymal transition and cancer  
942 stem cell traits. *Int J Oncol.* **44**,403-11(2014).
- 943 34. Moore, R.G., Hill, E.K., Horan, T., Yano, N., Kim, K., MacLaughlan, S., Lambert-  
944 Messerlian, G., Tseng, Y.D., Padbury, J.F., Miller, M.C., Lange, T.S., Singh, R.K. *Sci*  
945 *Rep.* **4**,3574(2014)
- 946 35. Bolger, A.M., Lohse, M., Usadel, B. Trimmomatic: a flexible trimmer for Illumina sequence  
947 data. *Bioinformatics.* **30**,2114–2120(2014).
- 948 36. Dobin, A., Davis, C.A., Schlesinger, F., Drenkow, J., Zaleski, C., Jha, S., Batut, P., Chaisson,  
949 M., Gingeras, T.R. STAR: ultrafast universal RNA-seq aligner. *Bioinformatics.* **29**,15-21(2012).

- 950 37. R Core Team. R: A language and environment for statistical computing. R Foundation for  
951 Statistical Computing, Vienna, Austria. (2016). URL <https://www.R-project.org/>
- 952 38. Love, M.I., Huber, W., Anders, S. "Moderated estimation of fold change and dispersion  
953 for RNA-seq data with DESeq2." *Genome Biology* **15**,550(2014).
- 954 39. Liao, Y., Smyth, G.K., Shi, W. featureCounts: an efficient general-purpose program for  
955 assigning sequence reads to genomic features. *Bioinformatics* **30**, 923-930(2014).
- 956 40. Heasley, L.R., Garcia III G., McMurray MA. Off-Target Effects of the Septin Drug  
957 Forchlorfenuron on Nonplant Eukaryotes. *Eukaryotic Cell* **13**;1411-1420 (2014).
- 958 41. Slamon, D.J., Clark, G.M., Wong, S.G., Levin, W.J., Ullrich, A., McGuire, W.L. Human  
959 breast cancer: correlation of relapse and survival with amplification of the HER-2/neu  
960 oncogene. *Science* **235**:177-182 (1987).
- 961 42. Pohlmann, P.R., Mayer, I.A., Mernaugh, R. Resistance to Trastuzumab in Breast  
962 Cancer. *Clin Cancer Res.***15**:7479-7491 (2009).
- 963 43. Hayes, D.F., Yamauchi, H., Broadwater, G., Cirincione, C.T., Rodrigue, S.P., Berry,  
964 D.A., Younger, J., Panasci, L.L., Millard, F., Duggan, D.B., Norton, L., Henderson, I.C.;  
965 Cancer and Leukemia Group B. Circulating HER-2/erbB-2/c-neu (HER-2) extracellular  
966 domain as a prognostic factor in patients with metastatic breast cancer: Cancer and  
967 Leukemia Group B Study 8662. *Clin. Cancer Res.***7**,2703-11 (2001).
- 968 44. Belkacemi, Y., Hanna, N.E., Besnard, C., Majdoul, S., Gligorov, J. Local and Regional  
969 Breast Cancer Recurrences: Salvage Therapy Options in the New Era of Molecular  
970 Subtypes. *Front Oncol.* **8**,112(2018).
- 971 45. Clayton, A.J., Danson, S., Jolly, S., Ryder, W.D., Burt, P.A., Stewart, A.L., Wilkinson,  
972 P.M., Welch, R.S., Magee, B., Wilson, G., Howell, A., Wardley, A.M. Incidence of  
973 cerebral metastases in patients treated with trastuzumab for metastatic breast cancer. *Br*  
974 *J Cancer* **91**,639-643 (2004).
- 975 46. Morris PG, McArthur HL, Hudis CA. Therapeutic options for metastatic breast cancer.  
976 *Expert Opin Pharmacother.* **10**,967-981(2009).

977  
978 **Author contributions:** RS conceived the idea, designed study, synthesized compounds  
979 including UR214-9 and conducted animal experiments in team with LL. LL ran xenograft animal  
980 studies, recorded tumor size measurements and animal weights without involvements of RS. LR  
981 and JK participated in animal studies. CL conducted the docking studies. AJ, NK, PS, RP, AA and  
982 KKK conducted western blot, immunoprecipitation, cell viability and other supplementary studies.  
983 VH performed confocal microscopic studies. TC conducted antibody array, cell cycle and live-  
984 dead cell assay experiments. RNA-seq data was generated and analyzed by the team of CB,  
985 JRM, EZ and JA. RS assembled the manuscript. RT, MTM, DL, RGM and SG reviewed the data  
986 and edited the manuscript. Every author read and edited the manuscript, and approved the  
987 present version of manuscript for submission.

988  
989 **Acknowledgements:** KKK and RS are grateful to UR Ventures of University of Rochester for a  
990 pilot grant award. RS gratefully acknowledges Mae Goode Foundation award to partially support  
991 these studies.

992  
993 **Conflict of Interest:** KKK, RBRT, RGM and RS are listed as the co-inventors on a provisional  
994 US patent application US62/894,424 covering UR214-9 and its analogs for the treatment of  
995 malignancies and other disease states orchestrated by septins.

996  
997
